# Supplementary material for: How Naive T-Cell Clone Counts Are Shaped By Heterogeneous Thymic Output and Homeostatic Proliferation
Source: PubMed Central journal article supplement (PMC8891377; doi:10.3389/fimmu.2021.735135), 2022-02-17
Supplement: Presentation_1.pdf [file Presentation_1.pdf]

## Supplementary Material

### 1 NEUTRAL MODEL

Here, we review the neutral BDI model in which there is no heterogeneity in either proliferation or immigration rates,  $\pi(\alpha, r) = \delta(\alpha - \bar{\alpha})\delta(r - \bar{r})$ . Upon inserting this expression for  $\pi(\alpha, r)$  in Eq. 8, we find that the clone abundance  $c_k$  follows a negative binomial distribution (?):

$$c_k = Q \left(1 - \frac{\bar{r}}{\mu^*}\right)^{\bar{\alpha}/\bar{r}} \left(\frac{\bar{r}}{\mu^*}\right)^k \frac{1}{k!} \prod_{\ell=0}^{k-1} \left(\frac{\bar{\alpha}}{\bar{r}} + \ell\right). \quad (\text{S1})$$

We can also express  $c_k/C$ , the clone abundance distribution normalized by the mean richness  $C$  in the body, as

$$\frac{c_k}{C} = \frac{c_k}{\sum_{\ell \geq 1} c_\ell} \quad (\text{S2})$$

where  $C = \sum_{\ell=1} c_\ell = Q(1 - (1 - \bar{r}/\mu^*)^{\bar{\alpha}/\bar{r}})$  is  $C^S$  in Eq. 12 with  $\eta = 1$ . Using  $\bar{\alpha} \approx 1.6 \times 10^{-8}/\text{day}$ ,  $\bar{r} \sim 5 \times 10^{-4}/\text{day}$ , and  $\mu^* \approx 6.4 \times 10^{-4}$ , we find  $\bar{\alpha}/\bar{r} \ll \bar{r}/\mu^* \sim O(1)$ . The  $\bar{\alpha}/\bar{r} \ll 1$  regime allows us to approximate  $c_k/C$  as a log-series distribution with parameter  $\bar{r}/\mu^*$ . To mathematically show this, consider a random variable  $X$  that follows a negative binomial distribution of parameters  $\bar{\alpha}/\bar{r}$  and  $\bar{r}/\mu^*$

$$\mathbb{P}[X = k] = \left(1 - \frac{\bar{r}}{\mu^*}\right)^{\bar{\alpha}/\bar{r}} \left(\frac{\bar{r}}{\mu^*}\right)^k \frac{1}{k!} \prod_{\ell=0}^{k-1} \left(\frac{\bar{\alpha}}{\bar{r}} + \ell\right). \quad (\text{S3})$$

Note that the probability mass function of  $X$  above is also given by  $c_k/Q$  as can be seen from Eq. S1, the clone abundance distribution for all possible  $Q$  clones, which includes  $c_0$ , the number of all clones that are not represented in the organism. To find the clone abundance distribution  $c_k/C$ , for all the  $C$  clones present in the organism, we must exclude the case  $k = 0$  by marginalizing the distribution of  $X$  over all  $X > 0$ :

$$\mathbb{P}[X = k | X > 0] = \frac{\mathbb{P}[X = k]}{\sum_{\ell \geq 1} \mathbb{P}[X = \ell]} = \frac{c_k/Q}{\sum_{\ell \geq 1} c_\ell/Q} = \frac{c_k}{C}. \quad (\text{S4})$$

What remains is to show that the distribution in Eq. S4 converges to a log-series distribution of parameter  $\bar{r}/\mu^*$  when  $\bar{\alpha}/\bar{r} \rightarrow 0$ . Consider the moment generating function of  $X | X > 0$  given by

$$\mathbb{E}\left[e^{\xi X} | X > 0\right] = \frac{\mathbb{E}\left[e^{\xi X}\right] - \mathbb{E}\left[e^{\xi X} | X = 0\right] \mathbb{P}[X = 0]}{\mathbb{P}[X > 0]}. \quad (\text{S5})$$

Since the moment generating function of a negative binomial distribution  $\mathbb{E}\left[e^{\xi X}\right]$  is known, and since  $\mathbb{P}[X > 0] = 1 - \mathbb{P}[X = 0]$  (see Eq. S3), we can write

$$\mathbb{E} \left[ e^{\xi X} | X > 0 \right] = \frac{\left( \frac{1 - \bar{r}/\mu^*}{1 - e^{\xi \bar{r}/\mu^*}} \right)^{\bar{\alpha}/\bar{r}} - \left( 1 - \frac{\bar{r}}{\mu^*} \right)^{\bar{\alpha}/\bar{r}}}{1 - \left( 1 - \frac{\bar{r}}{\mu^*} \right)^{\bar{\alpha}/\bar{r}}}. \quad (\text{S6})$$

For any  $x > 0$ , the limit  $\bar{\alpha}/\bar{r} \rightarrow 0$  yields  $x^{\bar{\alpha}/\bar{r}} = 1 + (\bar{\alpha}/\bar{r}) \log x + o(\bar{\alpha}/\bar{r})$ . If we apply this result to Eq. S6 for  $\mathbb{E} \left[ e^{\xi X} | X > 0 \right]$ , we find

$$\begin{aligned} \mathbb{E} \left[ e^{\xi X} | X > 0 \right] &= \frac{1 + \frac{\bar{\alpha}}{\bar{r}} \log \left( \frac{\mu^* - \bar{r}}{\mu^* - e^{\xi \bar{r}}} \right) - \left( 1 + \frac{\bar{\alpha}}{\bar{r}} \log \left( 1 - \frac{\bar{r}}{\mu^*} \right) \right) + o\left(\frac{\bar{\alpha}}{\bar{r}}\right)}{-\frac{\bar{\alpha}}{\bar{r}} \log \left( 1 - \frac{\bar{r}}{\mu^*} \right) + o\left(\frac{\bar{\alpha}}{\bar{r}}\right)} \\ &= \frac{\log \left( 1 - e^{\xi \frac{\bar{r}}{\mu^*}} \right)}{\log \left( 1 - \frac{\bar{r}}{\mu^*} \right)} + o(1), \end{aligned}$$

which we recognize as the moment generating function of a log series distribution of parameter  $\bar{r}/\mu^*$ . Thus, we finally have

$$\lim_{\bar{\alpha}/\bar{r} \rightarrow 0} \frac{c_k}{C} = \frac{(\bar{r}/\mu^*)^k}{k \log \left( \frac{1}{1 - \bar{r}/\mu^*} \right)}. \quad (\text{S7})$$

## 2 EXPLICIT FORMS USING DIFFERENT IMMIGRATION AND PROLIFERATION RATE DISTRIBUTIONS

In the following, we propose four simplifying expressions for the heterogeneity-averaged clone counts  $c_k^s(\bar{\alpha}, \mu^*, w, \eta)$  derived from Eq. 18.

**Clone-independent Neutral model:**  $\pi(\alpha, r) = \delta(\alpha - \bar{\alpha})\delta(r - \bar{r})$

First, consider the simplest case where all naive T cells carry the same immigration and proliferation rates  $\bar{\alpha}$  and  $\bar{r}$ , respectively, and define  $\pi(\alpha, r) = \delta(\alpha - \bar{\alpha})\delta(r - \bar{r})$ . This case corresponds to  $w \rightarrow 0$  and  $r \rightarrow \bar{r} = 1/2$  in the  $\pi_r(r|w)$  box distribution in Eq. 13. The self-consistent condition for  $\mu^*$  and  $\bar{\alpha}/\bar{r}$  become

$$\frac{\bar{r}}{\mu^*} \rightarrow \frac{\lambda}{\lambda + 2\bar{\alpha}}, \quad \frac{\bar{\alpha}}{\bar{r}} \rightarrow 2\bar{\alpha}, \quad (\text{S8})$$

and the clone count given in Eq. 11 can be explicitly simplified to

$$c_k^s(\bar{\alpha}, \lambda, \eta) \equiv \frac{Q}{k!} \left( \frac{\eta\lambda}{\eta\lambda + 2\bar{\alpha}} \right)^k \left( \frac{2\bar{\alpha}}{\eta\lambda + 2\bar{\alpha}} \right)^{2\bar{\alpha}} \prod_{\ell=0}^{k-1} (2\bar{\alpha} + \ell). \quad (\text{S9})$$

The total sampled clone count is then

$$C^S(\bar{\alpha}, \lambda, \eta) = \sum_{k=1}^{\infty} c_k^S(\bar{\alpha}, \lambda, \eta) = Q \left[ 1 - \left( \frac{2\bar{\alpha}}{\eta\lambda + 2\bar{\alpha}} \right)^{2\bar{\alpha}} \right]. \quad (\text{S10})$$

**Fixed immigration rate, distributed proliferation:**  $\pi(\alpha, r) = \delta(\alpha - \bar{\alpha})\pi_r(r)$

Next, consider a common immigration rate  $\bar{\alpha}$  for all T cell clones and a box distribution  $\pi_r(r|w)$  of full width  $w = 1$ . Eq. 14 yields  $\mu^* = (1 - e^{-\lambda/\bar{\alpha}})^{-1}$ , so that the averaged clone counts from Eq. 11 are now explicitly

$$c_k^S(\bar{\alpha}, \lambda, \eta) \equiv \frac{Q}{k!} \int_0^1 dr \left( \frac{\eta r / \mu^*}{1 - (1 - \eta)r / \mu^*} \right)^k \left( \frac{1 - r / \mu^*}{1 - (1 - \eta)r / \mu^*} \right)^{\frac{\bar{\alpha}}{r}} \prod_{j=0}^{k-1} \left( \frac{\bar{\alpha}}{r} + j \right). \quad (\text{S11})$$

The total sampled clone count can also be explicitly expressed as the integral over  $C^S(\bar{\alpha}, r, \lambda|\eta)$  from Eq. 12:

$$C^S(\bar{\alpha}, \lambda, \eta) = Q \int_0^1 dr \left[ 1 - \left( \frac{1 - r / \mu^*}{1 - (1 - \eta)r / \mu^*} \right)^{\bar{\alpha}/r} \right]. \quad (\text{S12})$$

**Clone-specific immigration, fixed proliferation rate:**  $\pi(\alpha, r) = \pi_\alpha(\alpha|\bar{\alpha})\delta(r - \bar{r})$

Finally, we consider the case whereby all proliferation occurs at a fixed rate  $\bar{r}$  and  $\alpha$  is distributed according to Eq. 17, as determined from our OLGA sequence-drawing analysis. Using the same rate dimensionalization as before (Eqs. S8), we find explicitly

$$c_k^S(\bar{\alpha}, \lambda, \eta) = \frac{Q}{k!} \left( \frac{\eta\lambda}{\eta\lambda + 2\bar{\alpha}} \right)^k \sum_{j=1}^J \frac{b_j}{C_\star} \left( \frac{2\bar{\alpha}}{\eta\lambda + 2\bar{\alpha}} \right)^{2\alpha_j} \prod_{\ell=0}^{k-1} (2\alpha_j + \ell), \quad (\text{S13})$$

where  $\alpha_j$  depends implicitly on  $\bar{\alpha}$  through Eq. 16. Similarly, the total sampled clone count can be explicitly expressed as

$$C^S(\bar{\alpha}, \lambda, \eta) = Q \sum_{j=1}^J \frac{b_j}{C_\star} \left[ 1 - \left( \frac{2\bar{\alpha}}{\eta\lambda + 2\bar{\alpha}} \right)^{2\alpha_j} \right]. \quad (\text{S14})$$

### 3 SMALL AVERAGE IMMIGRATION RATE

Here, we show that if the support of  $\pi_\alpha(\alpha)$  is sufficiently small, the exponential term in Eq. 11  $(\cdot)^{\alpha/r} \sim 1$ , and the product term  $\sim (\alpha/r)(k-1)!$ . While  $\alpha$  is summed or integrated over, for reasonable distributions  $\pi_\alpha(\alpha)$ , the lowest few rates contribute the most and the average of a function over  $\pi_\alpha(\alpha)$  can be replaced by its value evaluated at the small average value  $\bar{\alpha}$ . Even though for  $r$  is integrated over  $(0, 1)$  for  $w = 1$ , and the region near  $0^+$  would lead to a large  $\alpha/r$ , the contribution from  $c_k^S(\alpha, r, \lambda, \eta)$  is also small near  $r = 0$ . We have numerically checked that for all cases of  $\bar{\alpha} \ll 1/2$ ,  $c_k^S$  can be approximated by

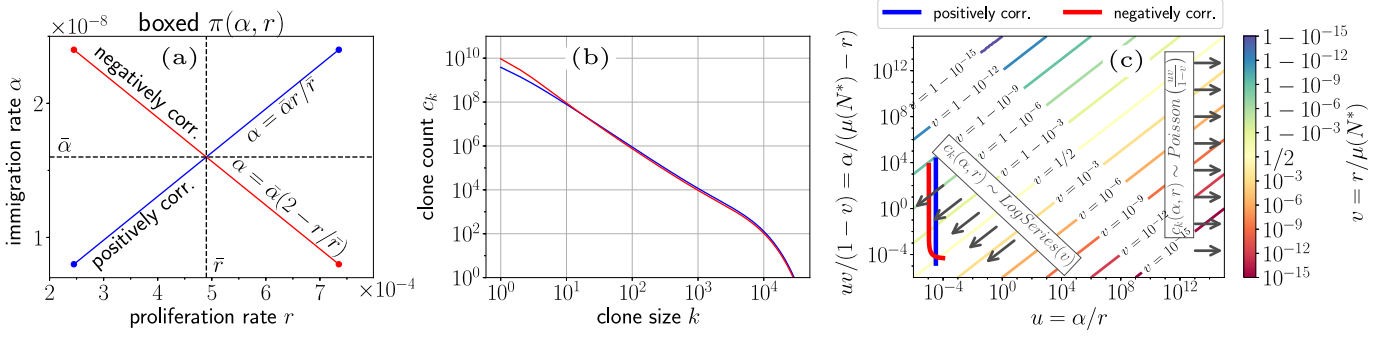

**Figure S1.** Positively and negatively correlated  $\pi(\alpha, r)$ . (a) For  $\bar{r}/2 \leq r \leq 2\bar{r}$ , we consider  $\pi(\alpha, r)$  distributions with positively and negatively correlated  $\alpha$  and  $r$  (Eqs. S18). (b) Mean sampled clone counts corresponding to positively and negatively correlated  $\pi(\alpha, r)$  show negligible differences. (c) “Line integrals” of the positively and negatively correlated distributions  $\pi(\alpha, r)$  in the  $uv/(1-v)$ - $u$  diagram. Clones counts predicted by such  $\pi(\alpha, r)$  follow log-series distributions, similar to those of a neutral model.

$$c_k^s(\alpha, r, \mu^*, \eta) \approx \frac{\alpha Q}{rk} \left( \frac{\eta r / \mu^*}{1 - (1 - \eta)r / \mu^*} \right)^k. \quad (\text{S15})$$

Thus, for general  $w$ ,  $f_k^s$  in Eq. 19 can be approximated by

$$f_k^s(\bar{\alpha}, \lambda, w, \eta) \equiv \frac{k c_k^s}{Q \eta \lambda} = \frac{\bar{\alpha}}{\eta \lambda w} \int_{\frac{1}{2} - \frac{w}{2}}^{\frac{1}{2} + \frac{w}{2}} \left( \frac{\eta r / \mu^*}{1 - (1 - \eta)r / \mu^*} \right)^k \frac{dr}{r}, \quad (\text{S16})$$

where  $\lambda \equiv N^*/Q$  and  $\mu^*$  is given by

$$\mu^* = \frac{\left(\frac{1}{2} + \frac{w}{2}\right) e^{\lambda w / \bar{\alpha}} - \left(\frac{1}{2} - \frac{w}{2}\right)}{e^{\lambda w / \bar{\alpha}} - 1}. \quad (\text{S17})$$

Since only  $\bar{\alpha}$  appears in Eqs. S16 and S17, the irrelevance of the shape of  $\pi_\alpha(\alpha)$  is apparent. We have explicitly shown that for small  $\bar{\alpha} \ll 1/2$ , the approximations in Eqs. S15 and S16 are quantitatively accurate. These simpler forms expedite our numerical analysis and fitting to data using Eq. 20.

## 4 CORRELATED IMMIGRATION AND PROLIFERATION RATES

Hitherto, we have considered independent immigration and proliferation, and assumed a factorisable rate distribution  $\pi(\alpha, r) = \pi_\alpha(\alpha)\pi_r(r)$ . However, immigration and proliferation rates may be correlated for certain clones. For example, a frequent realization of V(D)J recombination may also result in a TCR that is more likely to be activated for proliferation. In this case,  $\alpha$  would be positively correlated with  $r$ . In Fig. S1 we use dimensional rates and consider the effect of correlated  $\pi(\alpha, r)$ . For  $\bar{r}/2 \leq r \leq 2\bar{r}$ , we considered normalized, positively/negatively correlated box distributions as shown in Fig S1(a):

$$\begin{aligned} \text{Positively correlated : } \quad \pi(\alpha, r) &= \frac{1}{\bar{r}} \delta\left(\alpha - \frac{\bar{\alpha}}{\bar{r}} r\right), \\ \text{Negatively correlated : } \quad \pi(\alpha, r) &= \frac{1}{\bar{r}} \delta\left(\alpha - \bar{\alpha}\left(2 - \frac{r}{\bar{r}}\right)\right). \end{aligned} \quad (\text{S18})$$

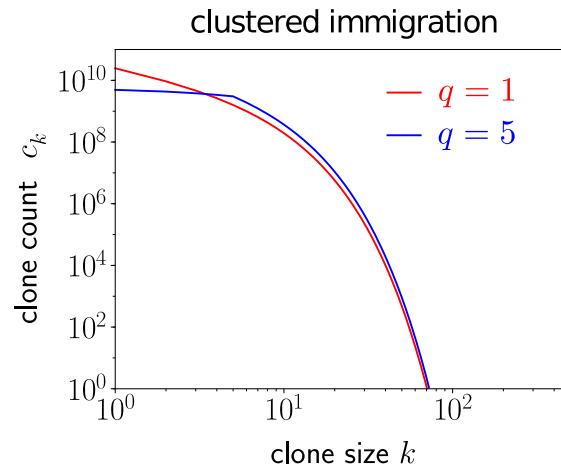

**Figure S2.** Clustered immigration in a neutral model. Comparison of clone abundances for a  $q = 1$  and  $q = 5$  models. The difference between the two predicted mean clone counts arise for  $k \lesssim q$ . Even after sampling, clone counts predicted under clustered immigration ( $q > 1$ ) yields a more slowly decreasing  $c_k^S$  for small  $k \lesssim q$ .

Within our mean field model, these positively and negatively correlated distributions  $\pi(\alpha, r)$  result in very similar expected clone abundance distributions  $c_k$  (Fig S1(b)). This insensitivity to correlations between immigration and proliferation can be qualitatively understood by considering the “line integral” over dominant paths of  $\pi(\alpha, r)$  in the  $uv/(1-v) = \alpha/(\mu^* - r)$  vs.  $u = \alpha/r$  diagram, as shown in Fig. S1(c). Both line integrals remain in the log-series distribution regime, indicating that the clone abundance distributions are qualitatively similar to those predicted by a model with proliferation heterogeneity alone.

## 5 MEAN CLONE COUNTS FOR CLUSTERED IMMIGRATION

We explore how clustered emigration from the thymus affects the mean clone count  $c_k$ . Suppose that  $q$  cells of the same clone (TCR nucleotide or amino acid sequence) are simultaneously exported by the thymus. The equation for the mean clone count  $c_k$  becomes

$$\frac{dc_k}{dt} = \sum_q \alpha_q [c_{k-q} - c_k] + r [(k-1)c_{k-1} - kc_k] + \mu(N) [(k+1)c_{k+1} - kc_k]. \quad (\text{S19})$$

This equation does not admit a simple analytic solution so we numerically solved the equation assuming  $\alpha_q = \alpha_5 \mathbb{1}(q, 5)$  and  $Q = 10^{11}$ . Fig. S2 compares the shapes of  $c_k$  for single cell immigration ( $q = 1$ ) and simultaneous multicell immigration  $q = 5$ . In general, for  $q > 1$ ,  $c_k$ , and ultimately  $c_k^S$  and  $f_k^S$  are flatter up to  $k \approx q$ , making the clone counts more sharply kink downwards near  $q$ . Thus, as can be seen from Fig. 9(a,b), we can reasonably conclude that some level of paired immigration would provide even better fits to the data at appropriately small values of  $\lambda$ , especially for the first few  $k$ -points.
